# Supplementary material
Source: MDPI journal article supplement (https://www.mdpi.com/2073-4344/13/4/775)
Supplement: s1 [file s1 › catalysts-2305843-supplementary.pdf]

# Sodium Silicates Modified Calcium Oxide as a High-Performance Solid Base Catalyst for Biodiesel Production

## 1. Method of Synthesizing $\text{Na}_2\text{CaSiO}_4$

$\text{Na}_2\text{CaSiO}_4$  was synthesized using the sol-gel method. First, 8.5 g  $\text{NaNO}_3$ , 11.8 g  $\text{Ca}(\text{NO}_3)_2 \cdot 4\text{H}_2\text{O}$ , and 13.4 g L-alanine were dissolved in 50 mL of deionized water. Then, 10.4 g of TEOS (tetraethyl orthosilicate) was added to the above solution. Next, 600  $\mu\text{L}$  of  $\text{HNO}_3$  (~65%) was added to the mixture and then stirred at 37 °C for 18 h and 70 °C for 5 h to produce a gel-like product. The gel was then put in a drying oven at 60 °C for at least 40 h. The dried gel was ground into powder and subjected to calcination with a 2 °C/min temperature rising program to 1050 °C and kept for 2 h. Figure S1 shows the SEM picture of the as-synthesized  $\text{Na}_2\text{CaSiO}_4$ . Figure S2 shows the XRD results of the as-synthesized  $\text{Na}_2\text{CaSiO}_4$  with the standard PDF card (No. 00-03-0831). Figure S3 depicts the crystal structure of  $\text{Na}_2\text{CaSiO}_4$ .

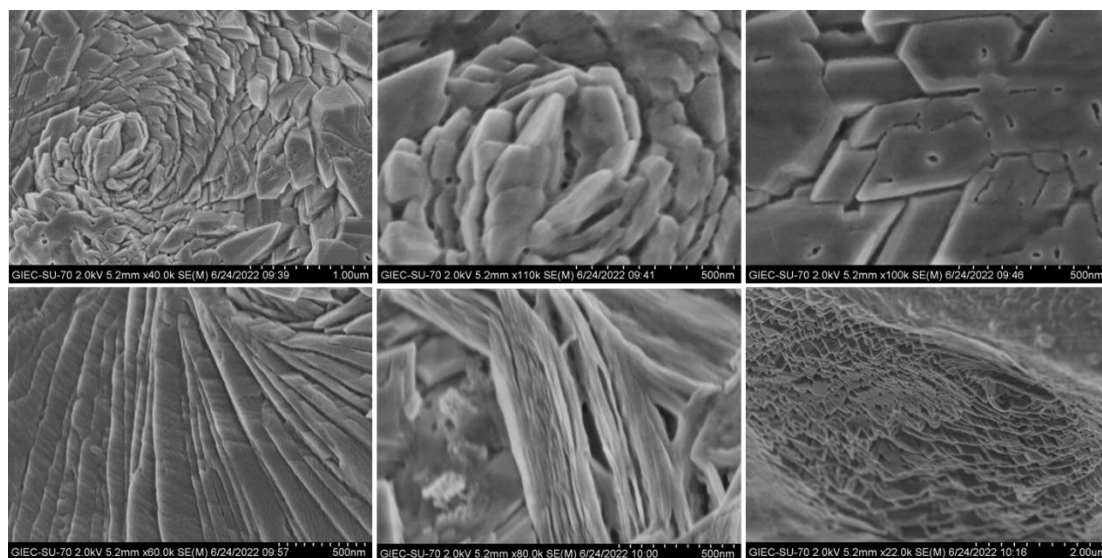

**Figure S1.** SEM picture of the as-synthesized  $\text{Na}_2\text{CaSiO}_4$ .

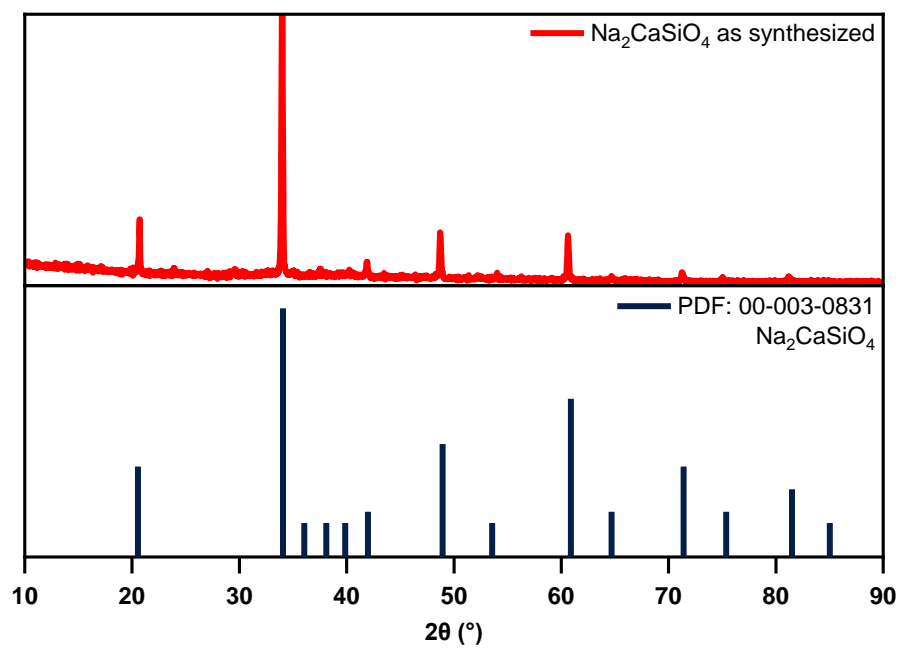

**Figure S2.** XRD results of the as-synthesized Na<sub>2</sub>CaSiO<sub>4</sub>.

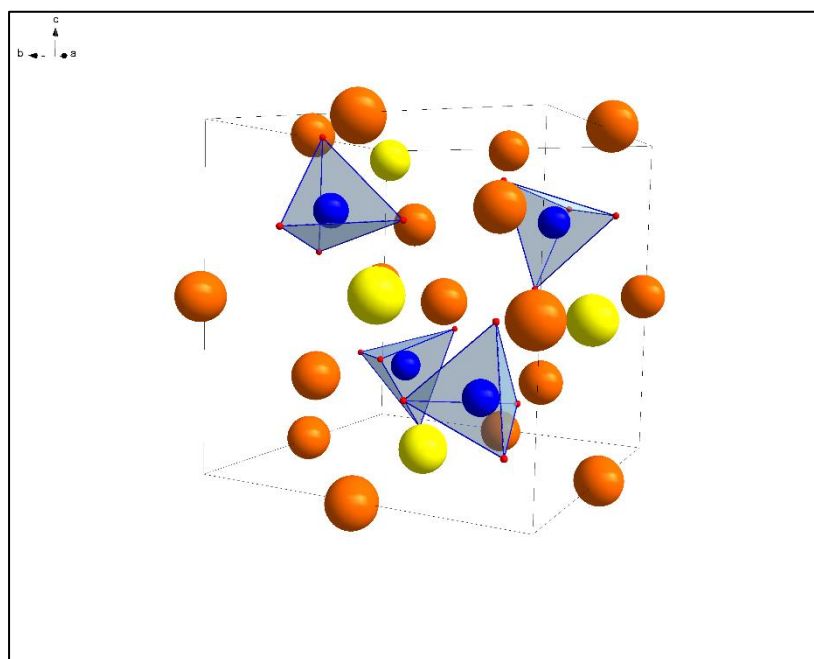

**Figure S3.** Crystal structure of Na<sub>2</sub>CaSiO<sub>4</sub>.

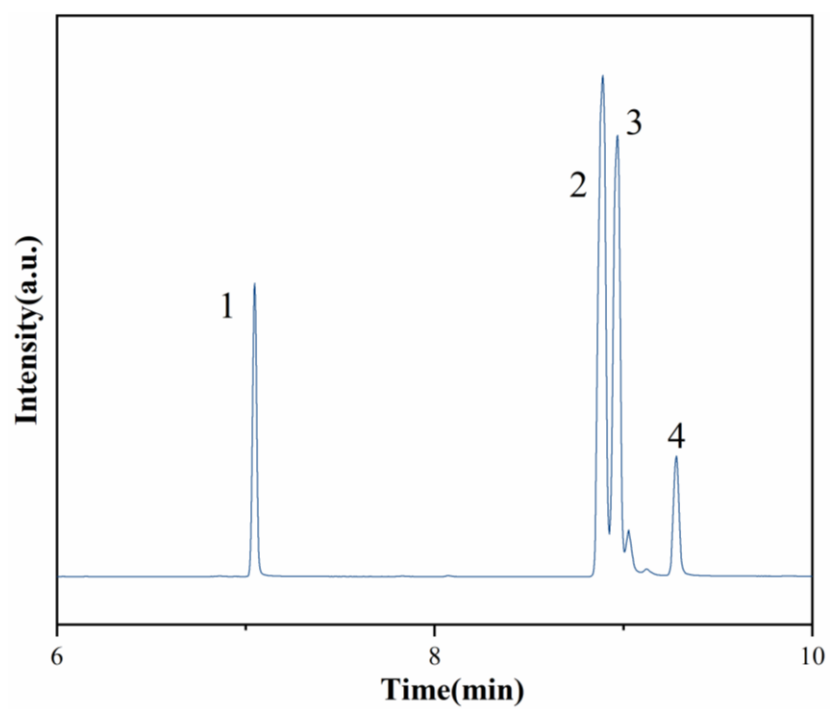

**Figure S4.** GCMS spectra of biodiesel.

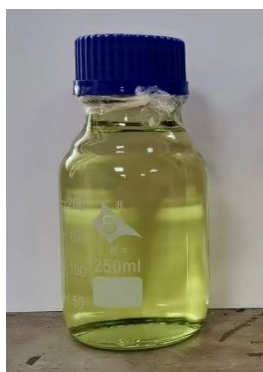

**Figure S5.** Biodiesel product from soybean oil.

**Table S1.** Molecular structures for biodiesel by GCMS.

| Numbers | Formula           | Structural formula                                                                 |
|---------|-------------------|------------------------------------------------------------------------------------|
| 1       | $C_{17}H_{34}O_2$ | 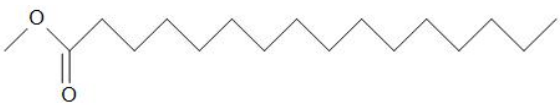 |
| 2       | $C_{17}H_{32}O_2$ | 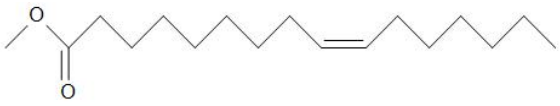 |
| 3       | $C_{19}H_{36}O_2$ | 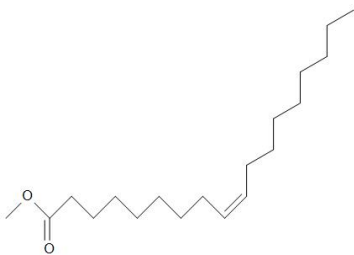 |
| 4       | $C_{19}H_{38}O_2$ | 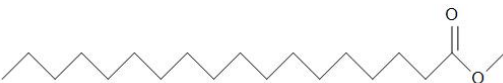 |

**Table S2.** Key properties of biodiesel product from soybean oil.

| Item                    | Values |
|-------------------------|--------|
| Density (kg/L)          | 0.89   |
| Acid value (mg KOH/g)   | <0.05  |
| Flash point (°C)        | 170    |
| Calorific value (MJ/kg) | 40.0   |
| Sulfur content (mg/kg)  | <1     |
| Cetane value            | 55     |
| FAME content (%)        | 98.1   |
